# Supplementary material for: Co-cultivation of microalgae and bacteria for optimal bioenergy feedstock production in wastewater by using response surface methodology
Source: PubMed Central journal article supplement — Sci Rep. 2024 Sep 5;14:20703. doi: 10.1038/s41598-024-70033-1 (PMC11377697; doi:10.1038/s41598-024-70033-1), 2024-09-05
Supplement: 41598_2024_70033_MOESM1_ESM.pdf [file 41598_2024_70033_MOESM1_ESM.pdf]

**Supporting Information: Co-cultivation of Microalgae and Bacteria for Optimal Bioenergy  
Feedstock Production in Wastewater by Using Response Surface Methodology**

Kishore Gopalakrishnan<sup>1,2</sup>, Yongli Z. Wager<sup>1,\*</sup>, Javad Roostaei<sup>1,3</sup>

<sup>1</sup> Department of Civil and Environmental Engineering, Wayne state university, 5050 Anthony  
Wayne Dr, Detroit, MI, U.S. 48201

---

\* Corresponding author: [zhangyl@wayne.edu](mailto:zhangyl@wayne.edu). Department of Civil and Environmental Engineering, Wayne state university, 5050 Anthony Wayne Dr., Detroit, MI, U.S. 48201

<sup>2</sup> Current: Department of Biological Sciences, Wayne state university, 5047 Gullen Mall, Detroit, MI, U.S. 48202, [kishore.gopalakrishnan@wayne.edu](mailto:kishore.gopalakrishnan@wayne.edu)

<sup>3</sup> Current: Senior Principal Engineer, Hazen and Sawyer, [JRoostaei@hazenandsawyer.com](mailto:JRoostaei@hazenandsawyer.com).

## S1. Symbiotic Algae-Bacteria Seed Culture

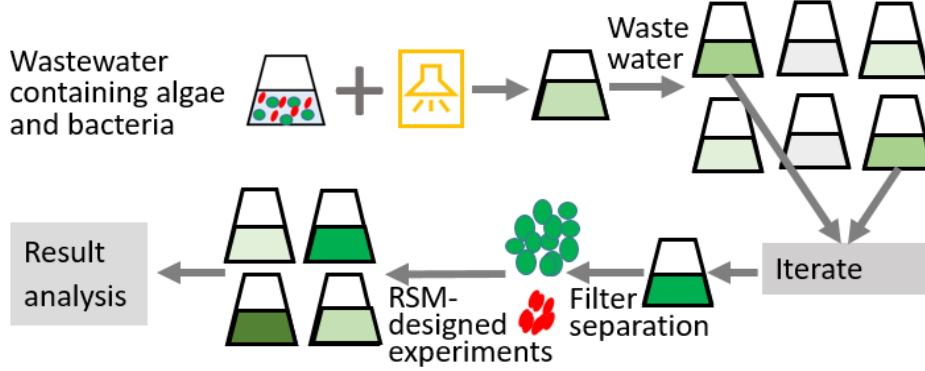

**Figure S1:** Screening pipeline for the selection of symbiotic algal-bacterial cultures.

## S2. Design of experiment

According to the methodology described by Gopalakrishnan et al. (2018) [1], equation S1 shows the correlation between the coded and the actual value in the regression study.

$$v_i = \frac{(V_i - V_i^*)}{\Delta V_i} \quad (S1)$$

- where  $v_i$  and  $V_i$  are the coded and un-coded value of the  $i^{\text{th}}$  independent variables respectively;  $V_i^*$  is the un-coded value of the  $i^{\text{th}}$  independent variable at the midpoint; and  $\Delta V_i$  is the difference in the values.

Table S1 summarizes the experimental design for thirty runs and two responses (algal biomass and lipid productivity). Equation S2 is the fitted quadratic equation [1] to estimate the correlation between the independent variables and responses:

$$y = \alpha_0 + \sum_{b=1}^c \alpha_j x_j + \sum_{b=1}^c \alpha_{jj} x_j^2 + \sum_{a=1}^{b-1} \sum_{c=2}^c \alpha_{ij} x_i x_j + \varepsilon \quad (S2)$$

$y$  = predicted response,  $\alpha_0$  = a constant,  $\alpha_j$  = linear coefficient,  $\alpha_{jj}$  = squared coefficient, and  $\alpha_{ij}$  = interaction coefficient,  $x_i$  and  $x_j$  are the independent variables and  $\varepsilon$  is noise or error.

### S3. Algal biomass and lipid productivity analyses

A comparison between Flow Cytometer Analyses and conventional measurements were performed to calibrate the results from different results. The gravimetric analysis [2] and oven drying method [3] were used for measure total lipid content and algal dry biomass respectively. Significant linear correlations were observed for both algal biomass and lipid productivity (Figures S2-3), which is consistent with other studies [4].

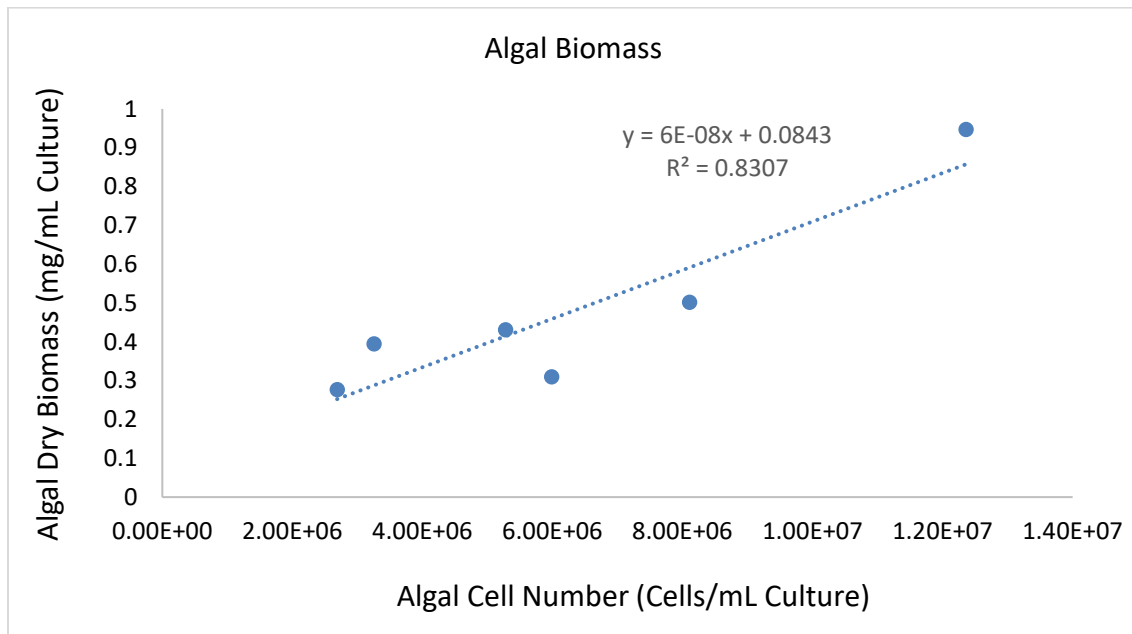

**Figure S2:** The significant correlation between algal cells measurement obtained from flow cytometer analysis and algal dry biomass.

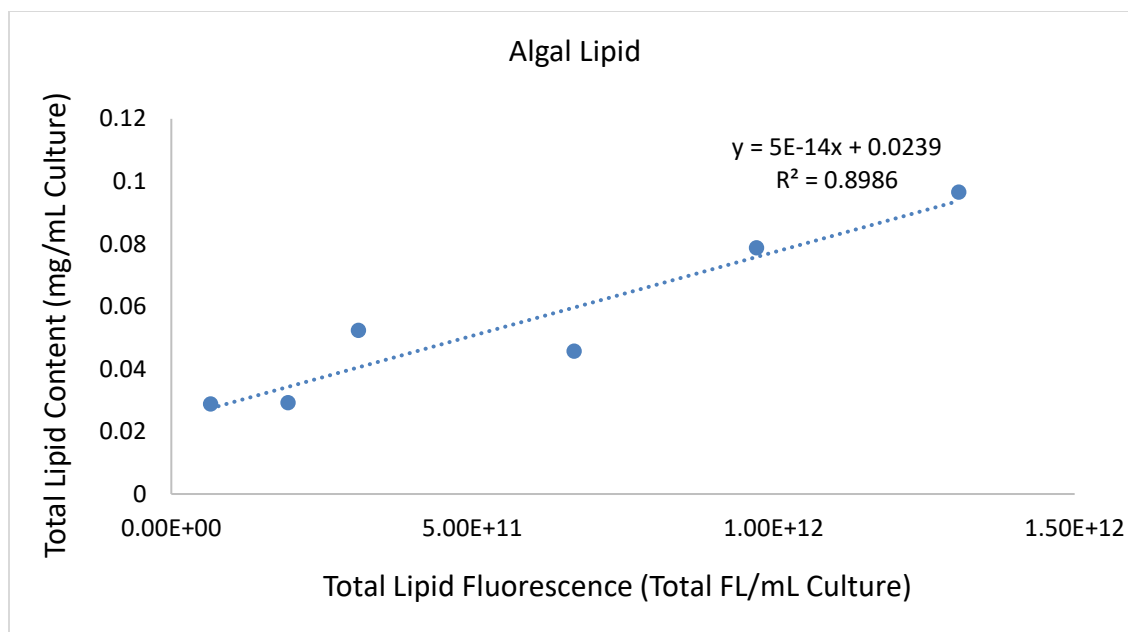

**Figure S3:** The significant correlation between total lipid fluorescence and gravimetric determination of total lipids.

### S3. Post-run Statistical Analysis

Design Expert® Software Version 10 (Stat-Ease Inc., Minneapolis, USA) was used for the post-run statistical analysis to develop the predicted model based on the method described in our previous study [1]. The results of the statistical analyses were summarized in Table S1.

**Table S1:** Variance analysis of response surface quadratic model for algal biomass (S2a) and algal lipid productivity (S2b). Sum of squares signifies the deviation of the experimental data from the mean value. Degree of freedom is represented by df that is the number of freedom independent ways the dynamic system can be moved. Mean square is the degree of freedom divided by the df.

**Table S1a.**

| Source            | Sum of Squares      | df | Mean Square         | F Value | p-value Prob > F |             |
|-------------------|---------------------|----|---------------------|---------|------------------|-------------|
| Model             | $1.578 \times 10^7$ | 14 | $1.127 \times 10^6$ | 3.29    | 0.0144           | Significant |
| A-Bacteria ratio  | $4.963 \times 10^6$ | 1  | $4.963 \times 10^6$ | 14.47   | 0.0017           | Significant |
| B-light intensity | $1.426 \times 10^6$ | 1  | $1.426 \times 10^6$ | 4.16    | 0.0595           |             |
| C-CO <sub>2</sub> | $9.364 \times 10^5$ | 1  | $9.364 \times 10^5$ | 2.73    | 0.1193           |             |
| D-harvest time    | $1.950 \times 10^6$ | 1  | $1.950 \times 10^6$ | 5.68    | 0.0308           | Significant |
| AB                | $2.393 \times 10^4$ | 1  | $2.393 \times 10^4$ | 0.070   | 0.7953           |             |
| AC                | $1.114 \times 10^5$ | 1  | $1.114 \times 10^5$ | 0.32    | 0.5772           |             |
| AD                | $2.244 \times 10^5$ | 1  | $2.244 \times 10^5$ | 0.65    | 0.4313           |             |
| BC                | $3.124 \times 10^4$ | 1  | $3.124 \times 10^4$ | 0.091   | 0.7670           |             |
| BD                | $4.523 \times 10^4$ | 1  | $4.523 \times 10^4$ | 0.13    | 0.7216           |             |
| CD                | $7.962 \times 10^4$ | 1  | $7.962 \times 10^4$ | 0.23    | 0.6370           |             |
| A <sup>2</sup>    | $1.935 \times 10^4$ | 1  | $1.935 \times 10^4$ | 0.056   | 0.8155           |             |
| B <sup>2</sup>    | $1.609 \times 10^6$ | 1  | $1.609 \times 10^6$ | 4.69    | 0.0469           | Significant |
| C <sup>2</sup>    | $7.454 \times 10^5$ | 1  | $7.454 \times 10^5$ | 2.17    | 0.1612           |             |
| D <sup>2</sup>    | $4.740 \times 10^6$ | 1  | $4.740 \times 10^6$ | 13.81   | 0.0021           | Significant |
| Residual          | $5.147 \times 10^6$ | 15 | $3.431 \times 10^5$ |         |                  |             |
| Lack of Fit       | $5.139 \times 10^6$ | 10 | $5.139 \times 10^5$ | 2.88    | 0.1275           |             |
| Pure Error        | $7.722 \times 10^3$ | 5  | $1.544 \times 10^4$ |         |                  |             |
| Corrected Total   | $2.093 \times 10^7$ | 29 |                     |         |                  |             |

$R^2 = 0.7541$ ; Adjusted  $R^2 = 0.5246$

**Table S1b.**

| <b>Source</b>     | <b>Sum of Squares</b>  | <b>df</b> | <b>Mean Square</b>     | <b>F Value</b>         | <b>p-value Prob &gt; F</b> |                 |
|-------------------|------------------------|-----------|------------------------|------------------------|----------------------------|-----------------|
| Model             | 8.344×10 <sup>12</sup> | 14        | 5.960×10 <sup>11</sup> | 3.11                   | 0.0183                     | Significant     |
| A-Bacteria        | 4.488×10 <sup>11</sup> | 1         | 4.488×10 <sup>11</sup> | 2.34                   | 0.1466                     |                 |
| B-light intensity | 3.293×10 <sup>11</sup> | 1         | 3.293×10 <sup>11</sup> | 1.72                   | 0.2094                     |                 |
| C-CO <sub>2</sub> | 6.581×10 <sup>11</sup> | 1         | 6.581×10 <sup>11</sup> | 3.44                   | 0.0835                     |                 |
| D-harvest time    | 1.421×10 <sup>12</sup> | 1         | 1.421×10 <sup>12</sup> | 7.42                   | 0.0157                     | Significant     |
| AB                | 2.792×10 <sup>4</sup>  | 1         | 2.792×10 <sup>4</sup>  | 1.459×10 <sup>-7</sup> | 0.9997                     |                 |
| AC                | 2.267×10 <sup>9</sup>  | 1         | 2.267×10 <sup>9</sup>  | 0.012                  | 0.9148                     |                 |
| AD                | 4.188×10 <sup>11</sup> | 1         | 4.188×10 <sup>11</sup> | 2.19                   | 0.1598                     |                 |
| BC                | 1.142×10 <sup>11</sup> | 1         | 1.142×10 <sup>11</sup> | 0.60                   | 0.4519                     |                 |
| BD                | 1.100×10 <sup>10</sup> | 1         | 1.100×10 <sup>10</sup> | 0.057                  | 0.8138                     |                 |
| CD                | 1.225×10 <sup>12</sup> | 1         | 1.225×10 <sup>12</sup> | 6.40                   | 0.0231                     | Significant     |
| A <sup>2</sup>    | 1.961×10 <sup>11</sup> | 1         | 1.961×10 <sup>11</sup> | 1.02                   | 0.3276                     |                 |
| B <sup>2</sup>    | 1.287×10 <sup>12</sup> | 1         | 1.287×10 <sup>12</sup> | 6.72                   | 0.0204                     | Significant     |
| C <sup>2</sup>    | 9.206×10 <sup>11</sup> | 1         | 9.206×10 <sup>11</sup> | 4.81                   | 0.0445                     | Significant     |
| D <sup>2</sup>    | 1.640×10 <sup>12</sup> | 1         | 1.640×10 <sup>12</sup> | 8.57                   | 0.0104                     | Significant     |
| Residual          | 2.872×10 <sup>12</sup> | 15        | 1.915×10 <sup>11</sup> |                        |                            |                 |
| Lack of Fit       | 2.869×10 <sup>12</sup> | 10        | 2.869×10 <sup>11</sup> | 3.65                   | 0.0828                     | Not significant |
| Pure Error        | 2.899×10 <sup>9</sup>  | 5         | 5.798×10 <sup>8</sup>  |                        |                            |                 |
| Corrected Total   | 1.122×10 <sup>13</sup> | 29        |                        |                        |                            |                 |

R<sup>2</sup> = 0.7440; Adjusted R<sup>2</sup> = 0.5050

## References

1. Gopalakrishnan, K., J. Roostaei, and Y. Zhang, *Mixed culture of Chlorella sp. and wastewater wild algae for enhanced biomass and lipid accumulation in artificial wastewater medium*. *Frontiers of Environmental Science & Engineering*, 2018. **12**(4): p. 14.
2. Carpio, R.B., R.L. De Leon, and M.R. Martinez-Goss, *Growth, lipid content, and lipid profile of the green Alga, Chlorella Vulgaris Beij., under different concentrations of Fe and CO<sub>2</sub>*. *J Eng Sci Technol*, 2015. **6**: p. 19-30.
3. Roostaei, J., et al., *Mixotrophic Microalgae Biofilm: A Novel Algae Cultivation Strategy for Improved Productivity and Cost-efficiency of Biofuel Feedstock Production*. *Scientific reports*, 2018. **8**(1): p. 12528.
4. Rumin, J., et al., *The use of fluorescent Nile red and BODIPY for lipid measurement in microalgae*. *Biotechnology for biofuels*, 2015. **8**(1): p. 42.
